# Supplementary material for: Rapid removal of cadmium ions using green-synthesized Fe3O4 nanoparticles capped with diethyl-4-(4 amino-5-mercapto-4H-1,2,4-triazol-3-yl)phenyl phosphonate
Source: Royal Society of Chemistry journal article supplement (doi:10.1039/c5ra10628a), 2015-01-01
Supplement: c5ra10628a1.pdf [file c5ra10628a1.pdf]

## Supplementary materials

### **Rapid removal of cadmium ions by using diethyl 4-(4 amino-5-mercapto-4H-1,2,4-triazol-3-yl)-phenyl-phosphonate capped green synthesized Fe<sub>3</sub>O<sub>4</sub> magnetic nanoparticles**

Sada Venkateswarlu and Minyoung Yoon\*

Department of Nanochemistry, College of Bionano, Gachon University, Sungnam,  
461-701, Republic of Korea

\*Corresponding author. Tel.: 82-31-750-8721.

E-mail address: [myyoon@gachon.ac.kr](mailto:myyoon@gachon.ac.kr)

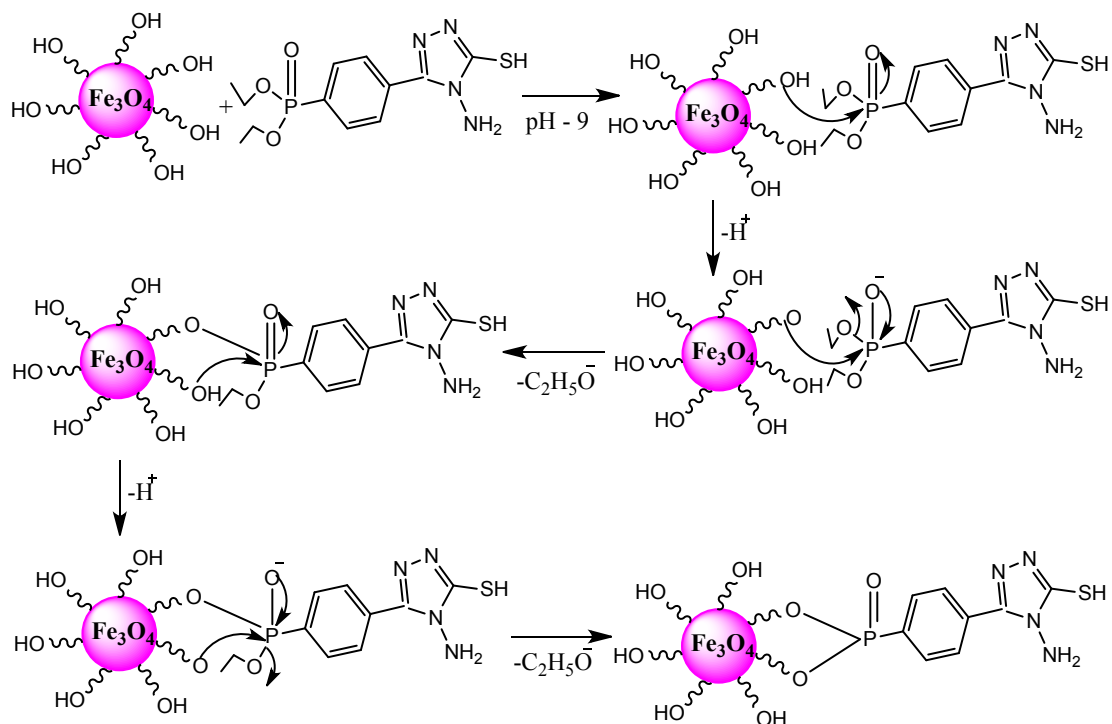

**Scheme S1** The mechanism of magnetite demonstrating covalently attachment of the ligand on the  $\text{Fe}_3\text{O}_4$  MNPs.

**Table S1.** Kinetic parameters of pseudo-first-order and pseudo-second-order models for the adsorption of Cd(II) on the DEAMTPP @ $\text{Fe}_3\text{O}_4$  MNPs.

| Pseudo-first-order            |                                    |                               |       | Pseudo-second-order                |                               |       |
|-------------------------------|------------------------------------|-------------------------------|-------|------------------------------------|-------------------------------|-------|
| $q_{e, \text{exp}}$<br>(mg/g) | $k_1$<br>(g/mg min <sup>-1</sup> ) | $q_{e, \text{cal}}$<br>(mg/g) | $R^2$ | $k_1$<br>(g/mg min <sup>-1</sup> ) | $q_{e, \text{cal}}$<br>(mg/g) | $R^2$ |
| 19.223                        | 0.242                              | 11.125                        | 0.869 | 0.0066                             | 20.790                        | 0.996 |

**Table S2.** Langmuir and Freundlich isotherm constants

| Isotherm type | Constant     | Value  |
|---------------|--------------|--------|
| Langmuir      | $q_m$ (mg/g) | 49.10  |
|               | $b$ (L/mg)   | 0.585  |
|               | $R^2$        | 0.9996 |
| Freundlich    | $k_f$ (mg/g) | 19.427 |
|               | $n$          | 4.766  |
|               | $R^2$        | 0.9881 |

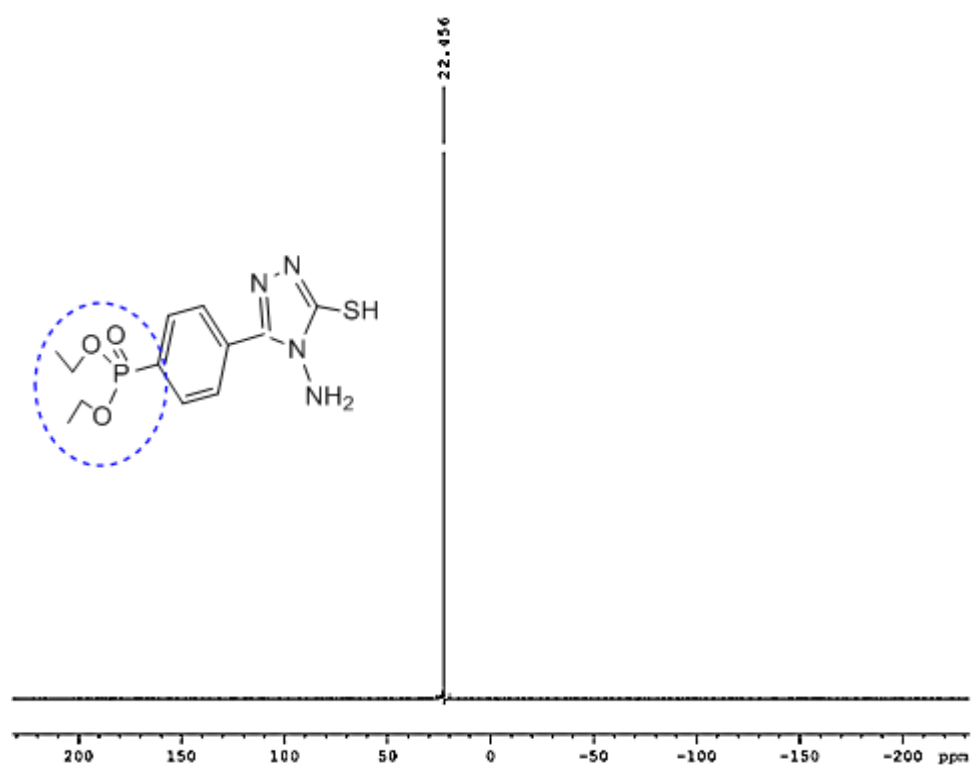

**Fig. S1** <sup>31</sup>P NMR spectrum of DEAMTPP.

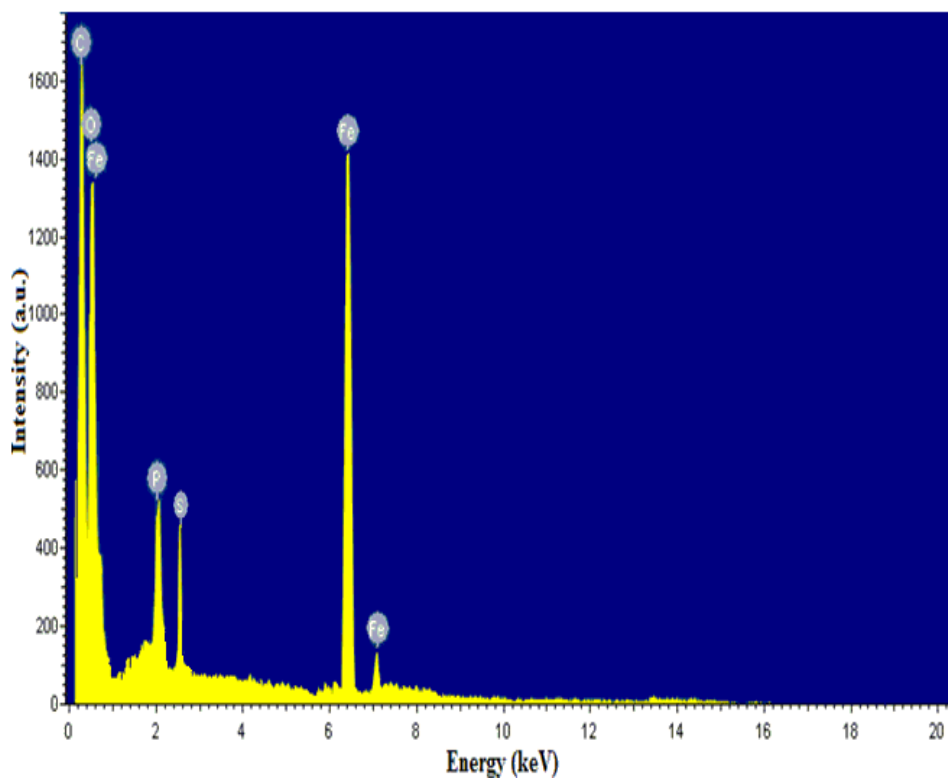

Fig. S2 EDS spectrum of DEAMTPP@ Fe<sub>3</sub>O<sub>4</sub> MNPs.

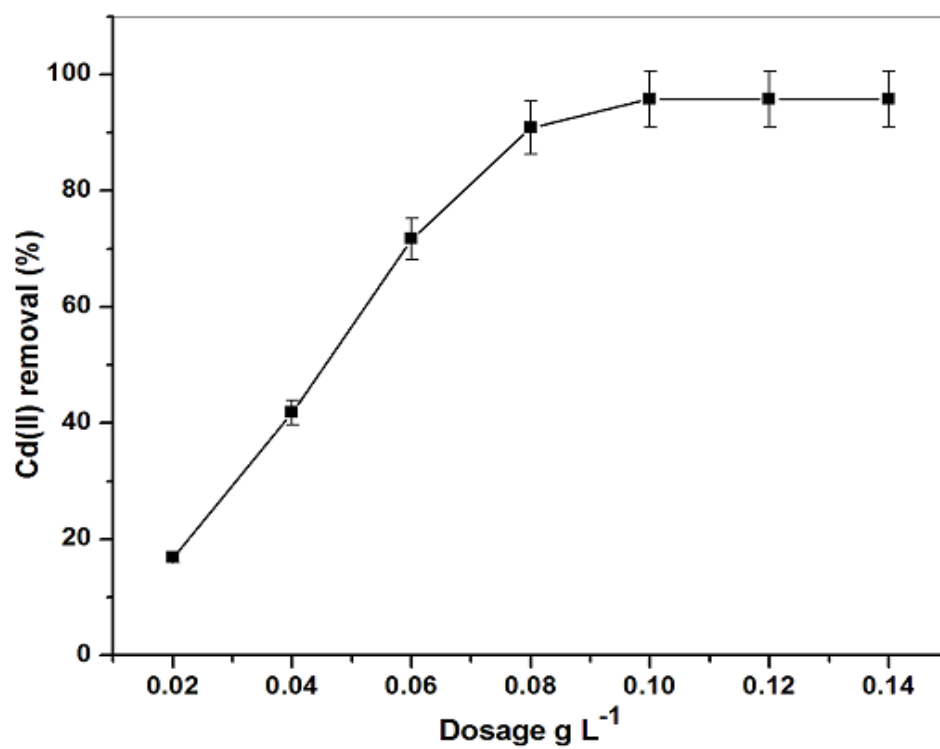

Fig. S3 Effect of adsorbent dosage on the removal rate of Cd(II) ions.

### Selective adsorption experiment

The selectivity of the adsorbent material for various metal ions is an important parameter related to the application potential of adsorption processes. Stock solutions for selectivity experiments were prepared using nitrate or sulfate metal salts ( $\text{Cd}(\text{NO}_3)_2 \cdot 4\text{H}_2\text{O}$ ,  $\text{Zn}(\text{NO}_3)_2 \cdot 6\text{H}_2\text{O}$ ,  $\text{Co}(\text{NO}_3)_2 \cdot 6\text{H}_2\text{O}$ ,  $\text{CuSO}_4 \cdot 5\text{H}_2\text{O}$  and  $\text{Ni}(\text{NO}_3)_2 \cdot 6\text{H}_2\text{O}$ ) dissolving in deionized Millipore water. The DEAMTPP@ $\text{Fe}_3\text{O}_4$  composite (5 mg) was placed in a 100 mL Erlenmeyer flask with of a metal ion ( $\text{Cd}^{2+}$ ,  $\text{Zn}^{2+}$ ,  $\text{Co}^{2+}$ ,  $\text{Cu}^{2+}$ , and  $\text{Ni}^{2+}$ ) mixture solution (50.0 mL, concentration: 60 mg/L, pH: 6.0). The mixture solution was ultrasonicated for 14 min and shaken in an incubator for 1 hour at 25 °C. After adsorbing with the mixed metal ions, the magnetic nano-adsorbent was separated from the solution. The concentrations of the mixed metal ions were determined using atomic absorption spectroscopy (AAS).

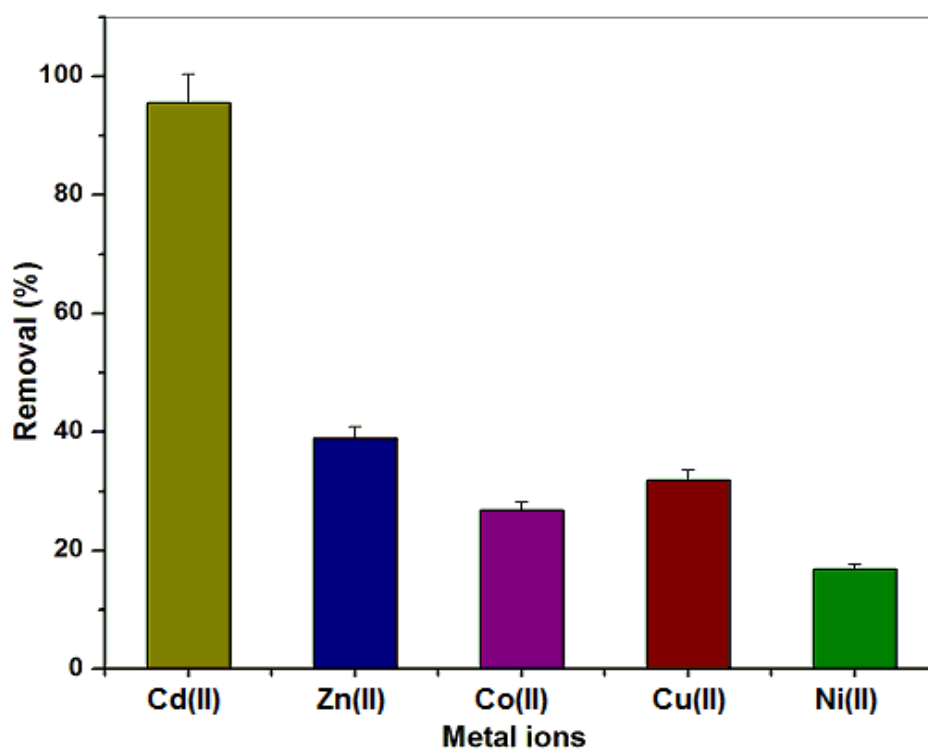

**Fig. S4** Cd(II) removal on the DEAMTPP@  $\text{Fe}_3\text{O}_4$  MNPs from a mixed solution of heavy metal ions(Cd, Zn, Co, Cu and Ni).
